# Supplementary material
Source: PubMed Central journal article supplement (PMC2670673)

# Supplemental Fig. 1

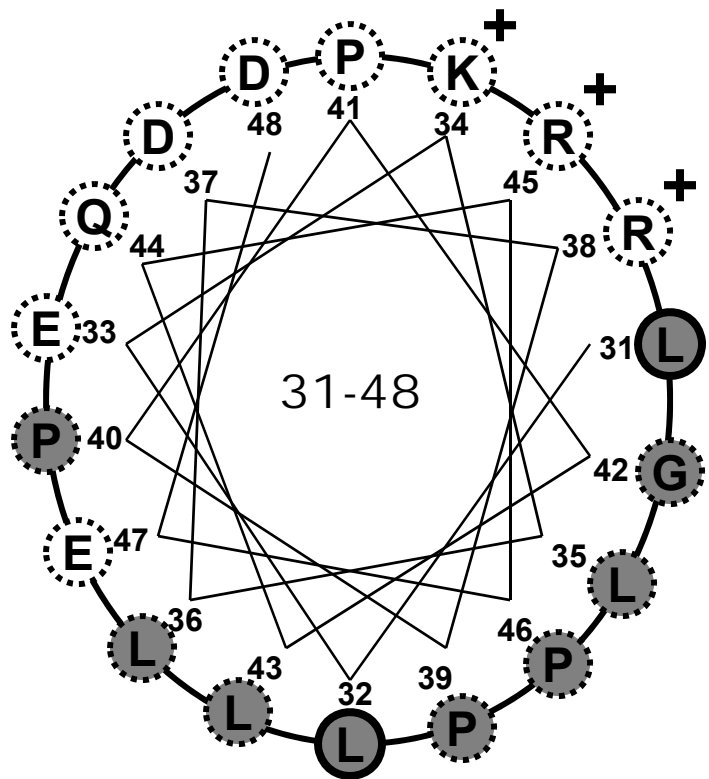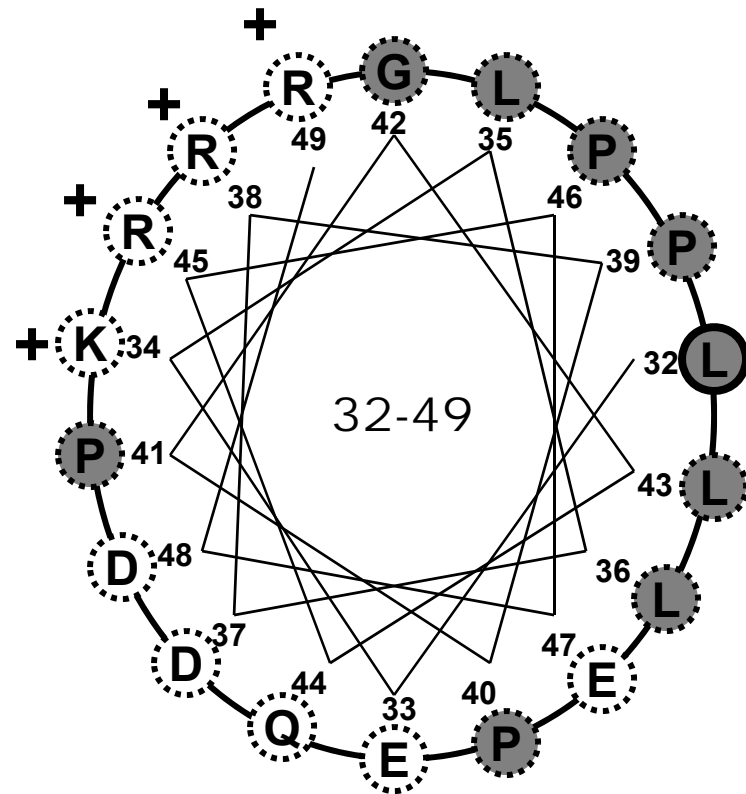

# Supplemental Fig.2

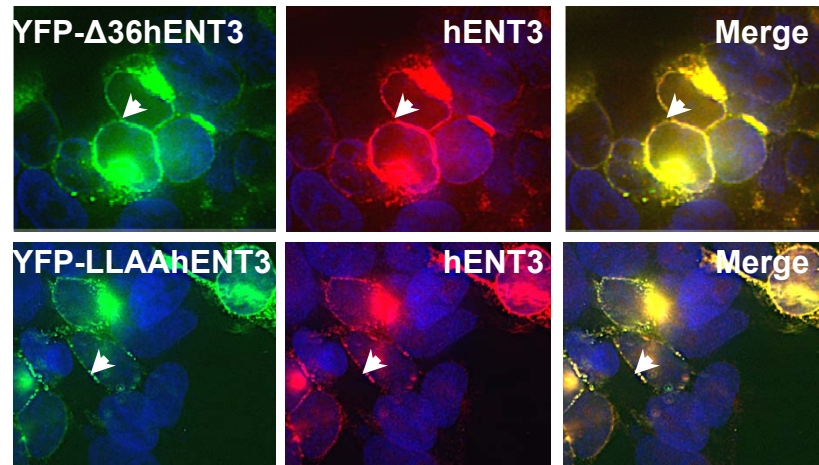

# Supplemental Fig. 3

**A**

GREEN FILTER

RED FILTER

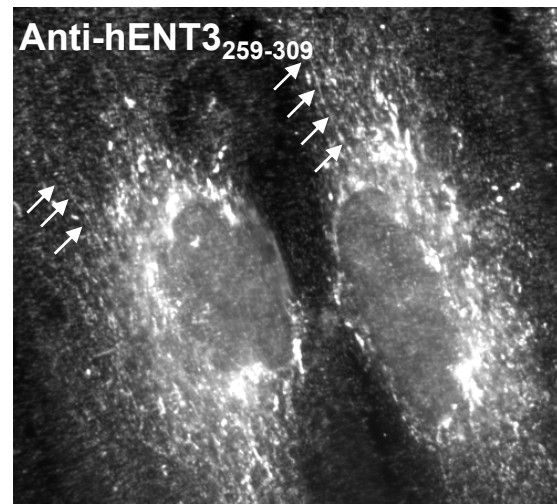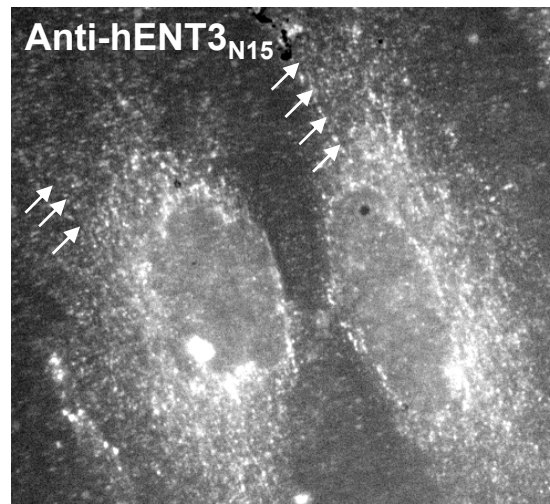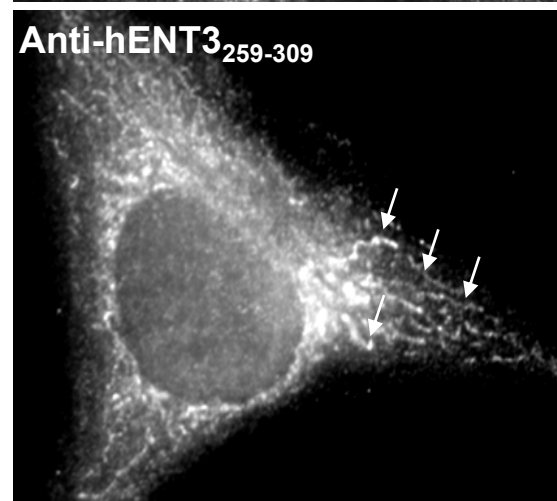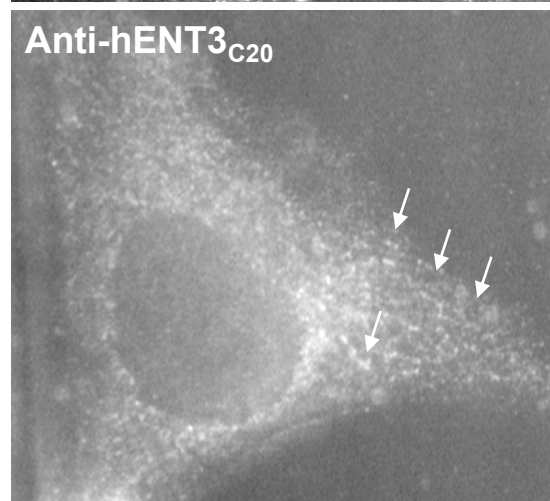**B**

Crude lysate  
Non-mitochondrial  
mitochondrial

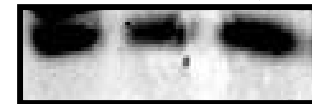Anti-hENT3<sub>259-309</sub>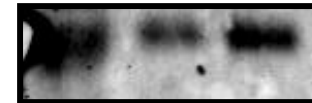Anti-hENT3<sub>N15</sub>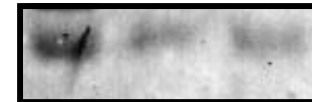Anti-hENT3<sub>C20</sub>

# Supplemental Fig. 4

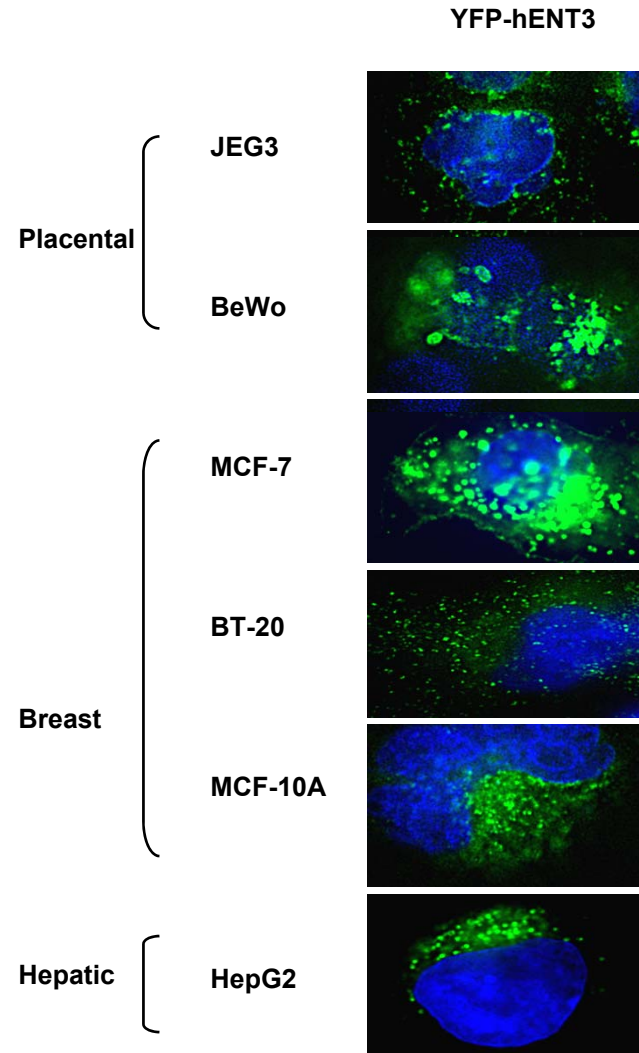

# Supplemental Fig. 5

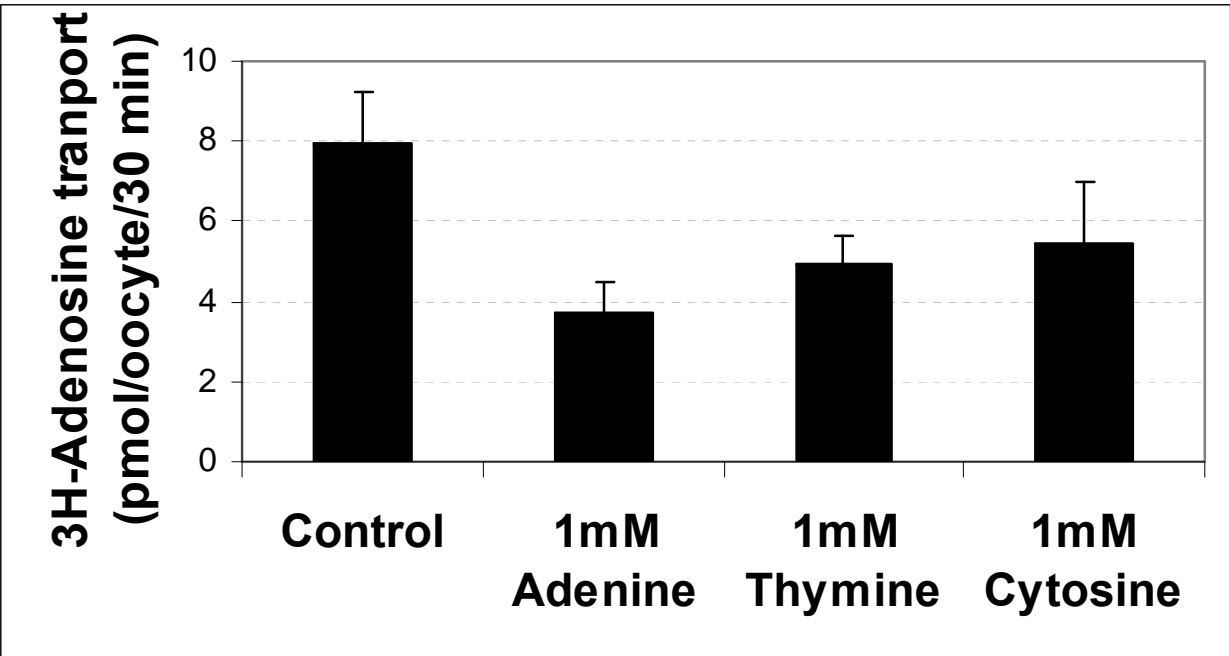

Supplement: 90672.2008_1.pdf [file 90672.2008_1.pdf]
